# Supplementary material for: Mutational disruption of the ABCC2 gene in fall armyworm, Spodoptera frugiperda, confers resistance to the Cry1Fa and Cry1A.105 insecticidal proteins
Source: PubMed Central journal article supplement (PMC5940765; doi:10.1038/s41598-018-25491-9), 2018-05-08
Supplement: 41598_2018_25491_MOESM1_ESM.pdf [file 41598_2018_25491_MOESM1_ESM.pdf]

1 Mutational disruption of the *ABCC2* gene in fall armyworm, *Spodoptera frugiperda*, confers  
2 resistance to the Cry1Fa and Cry1A.105 insecticidal proteins<sup>1</sup>

3 Authors: Lex Flage<sup>2,6</sup>, Young Wha Lee<sup>2,6</sup>, Humphrey Wanjugi<sup>2</sup>, Shilpa Swarup<sup>2</sup>, Alana Brown<sup>2</sup>,  
4 Jinling Wang<sup>3</sup>, Edward Kraft<sup>3,7</sup>, John Greenplate<sup>2</sup>, Jeni Simmons<sup>4</sup>, Nancy Adams<sup>4</sup>, Yanfei  
5 Wang<sup>2</sup>, Samuel Martinelli<sup>5</sup>, Jeffrey A. Haas<sup>2</sup>, Anilkumar Gowda<sup>2</sup>, and Graham Head<sup>5,\*</sup>.

6

7 <sup>1</sup>Dedicated to the memory of John Greenplate. This work would not have been possible without  
8 John's intelligence, experience, and friendship.

9 <sup>2</sup>Monsanto Company, Chesterfield, Missouri

10 <sup>3</sup>Monsanto Company, Cambridge, Massachusetts

11 <sup>4</sup>Monsanto Company, Union City, Tennessee

12 <sup>5</sup>Monsanto Company, Creve Coeur, Missouri

13 <sup>6</sup>These authors contributed equally

14 <sup>7</sup>Present address: Genentech,, South San Francisco, California

15 \*Correspondence to [graham.p.head@monsanto.com](mailto:graham.p.head@monsanto.com)

16

17 Supp. Figure S1

18 A) LC/MS/MS analysis of representative peptides identified as belonging to SfABCC2 in the  
19 susceptible BenzonS (top panel) and JuanaDiazR (bottom panel). MS/MS sequencing data of  
20 peptides identified in the eluted fraction in 9 out of 9 runs of the BenzonS colony samples and 0  
21 out of 9 runs in JuanaDiazR colony samples. B) The sequence map of the identified peptides are  
22 highlighted in green on the SfABCC2 peptide sequence.

23 A)

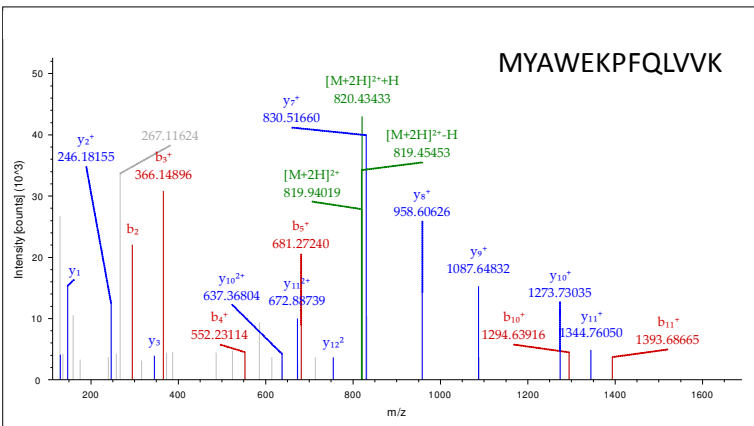

24

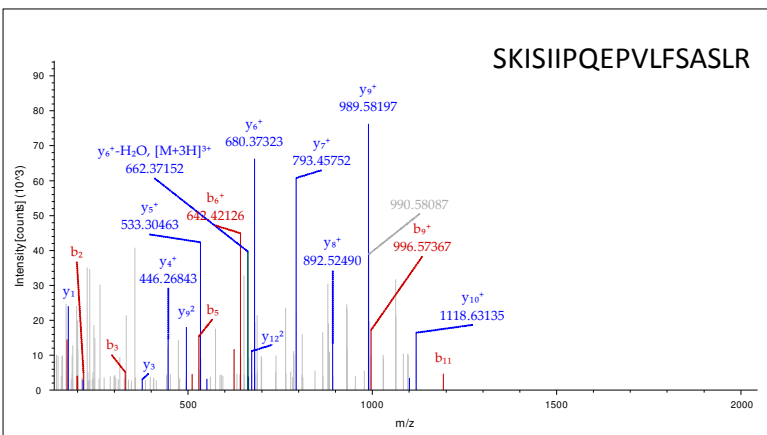

25

26 B)

27  
28 MMDKSNKNTA SNGTAVGEPK ERVRKKPNIL SRIFVWVWIFP VLITGNKR DV EEDDLIVPSK KFNSERQGEY FERYWFEEVA  
29 IAEREDRDP S LWKAMRRAYW LQYMPGALFV LLISGLRTAQ PLLFSQLLSY WSV DSEMSQQ DAGLYALAML GINFITMMCT  
30 HHNNLFVMRF SMKVK IAASS LLFRKLLR MS QVSVGDVAGG KLVNLLSNDV ARFDYAFMFL HYLWVVP LQV GVVLYFVYDA  
31 AGWAPYVGLF GVIIILMPLQ AGLTKLTGVV RRMTAKRTDK RIKLMSEIIN GIOVIKMYAW EKPFQLVVK A ARAYEMSALR  
32 KSIFIRSMFL GFMLFTERSV MFLTVLTLAL TGNMISATLI YPIQQYFGII TMNVTLLILPM AFASFSEMLI SLERIQGFLL  
33 LDER SDIQIT PKVVGAGSK LFNNSKKEGG LETGIVLPTK YSPTEANIAR PMQDEPNMAD YPVQLNK VNA TWADLNDNKE

34 MTLK NISLRV RKNKLCAVIG PVGSGK TSLL QLLR ELPVT SGNLSISGTV SYASQEPWLF PATVRENILF GLEYNVAKYK  
35 EVCKVCSLLP DFKQFPYGD L SLVGERGVSL SGGQRARINL ARAVYREADI YLLDDPLSAV DANVGRQLFD GCIKGYLSGK  
36 TCILVTHQIH YLKAADFIVV LNEGSVENMG SYDELMKTGT EFSMLLSQA SEGSDDTKKE RPAMMRGISK MSVKSDDEEG  
37 EEKVOVLEAE ERQSGSLKWD VLGRYMKS VN SWCMVMAFL VLVITQGAAT TDYWLSFWT NQVDGYIQL PEGESPNPEL  
38 NTQVGLLTTG QYLIVHGSVV LAIIILTQVR ILSFVVMTMR ASEN LHNTIY EK LIVAVMR FDTNP SGRVL NRFSK DMGAM  
39 DELLPR SMLE TVQMYLSLAS VLVLNAIALP WTLIPTTVLM FIFVFLKWI INAAQAVKRL EGTKSPVFG MINSTISGLS  
40 TIRSSNSQDR LLNSFDDAQN LHSAFYTF L GGSTAFGLYL DTLCLIYLG I IMSIFILGDF GELIPVGSVG LAVSQSMVLT  
41 MMLQMAAKFT ADFLGQMTAV ERVLEYTKLP TEENMETGPT TPPKGWPSAG EVTFSNVYLK YSPDDPPVLK DLNFAIK SGW  
42 KVGVVGR TGA GKSSLISALF RLS DITGSIK IDGLDTOGIA K KLLRSKISI IPOEPVL FSA SLRYNLDPFD NYNDDDIWRA  
43 LEQVELKESI PALDYKVSEG GTFNSMGQRQ LVCLARAILR SNKILIMDEA TANVDPQTDA LIQK TIRKQF ATCTVLTIAH  
44 RLNTIMDS DR VLVMDQGVAA EFDHPYILLS NPNSKFSSMV KETGDNMSRI LFEVAKTKYE SDSKTA\*

45

46 Supp. Figure S2:

47 Splicing pattern among R<sub>2</sub>, R<sub>1</sub>, and S genotypes. Below the first 18 cDNA sequences show aberrate splice patterns among R<sub>2</sub>/R<sub>2</sub>  
48 genotypes. The region of aberrant splicing spans from approx 580 to 710 bp in the transcript (black box). Below that are cDNA  
49 clones from R<sub>1</sub>/R<sub>1</sub> and S/S genotypes, which all have identical patterns, and maintain a proper reading frame (red box). The cDNA  
50 sequences below correspond to Genbank accessions MG387043-MG387070. The breakdown of clones is as follows:

- 51 Fam1 R1R1: 2
- 52 Fam1\_R2R2: 14
- 53 Fam1 SS: 4
- 54 Fam26 R2R2: 1
- 55 Fam26 SS: 2
- 56 Fam26\_R1R1: 1
- 57 Fam26 R2R2: 3

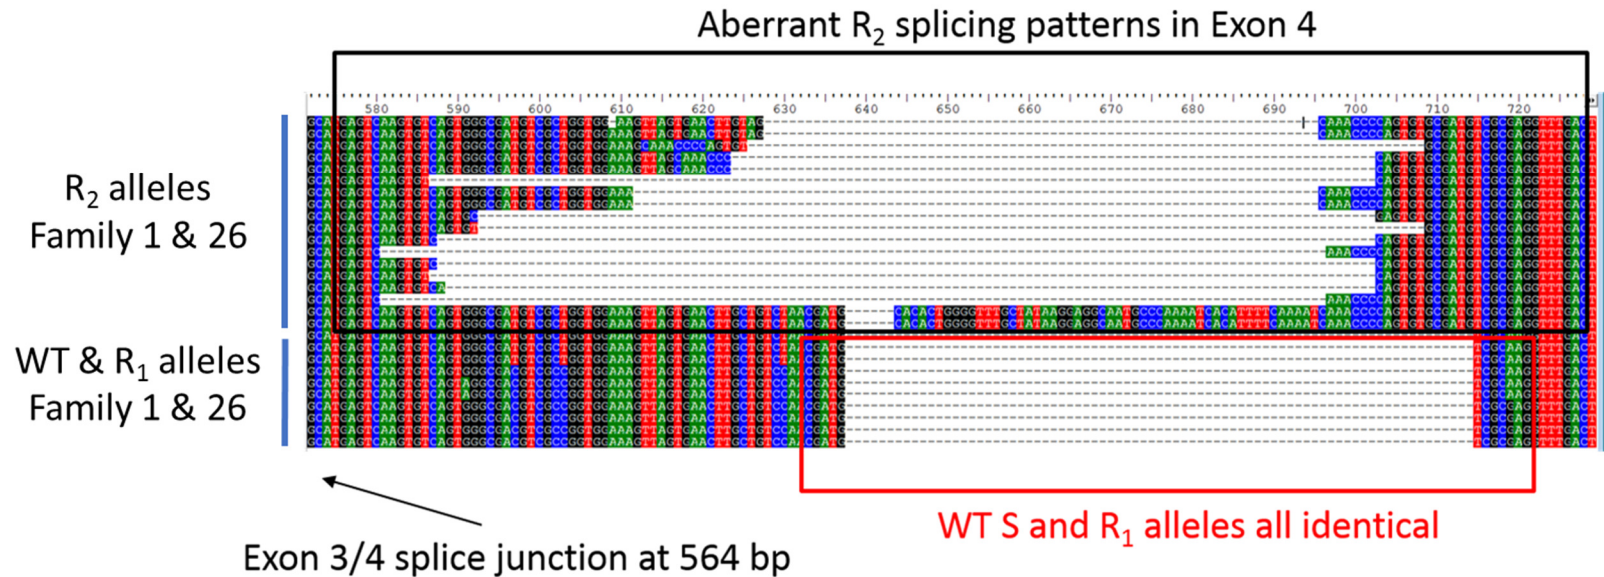

58

59



71 Supp. Figure S4: Stability of Cry1Fa toxin core resistance in *S. frugiperda* when removed from  
 72 selection pressure for one (a) or two (b) generations.

73

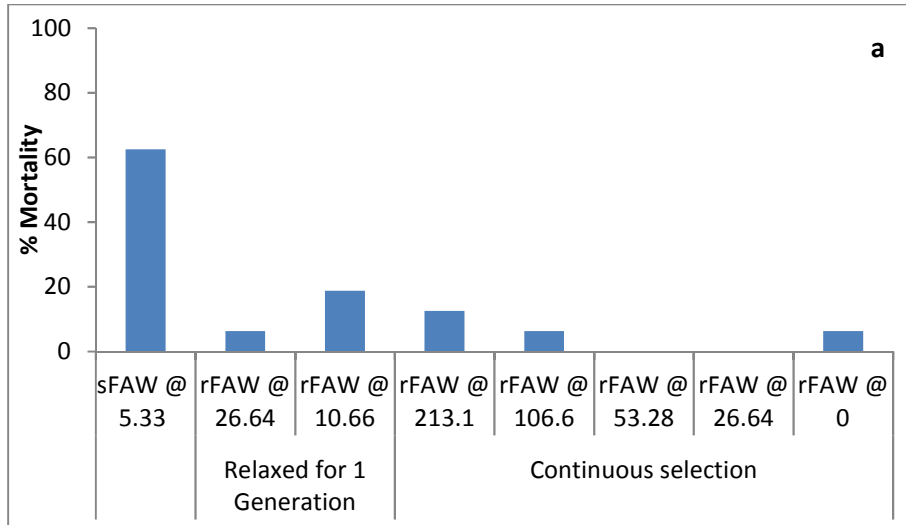

74

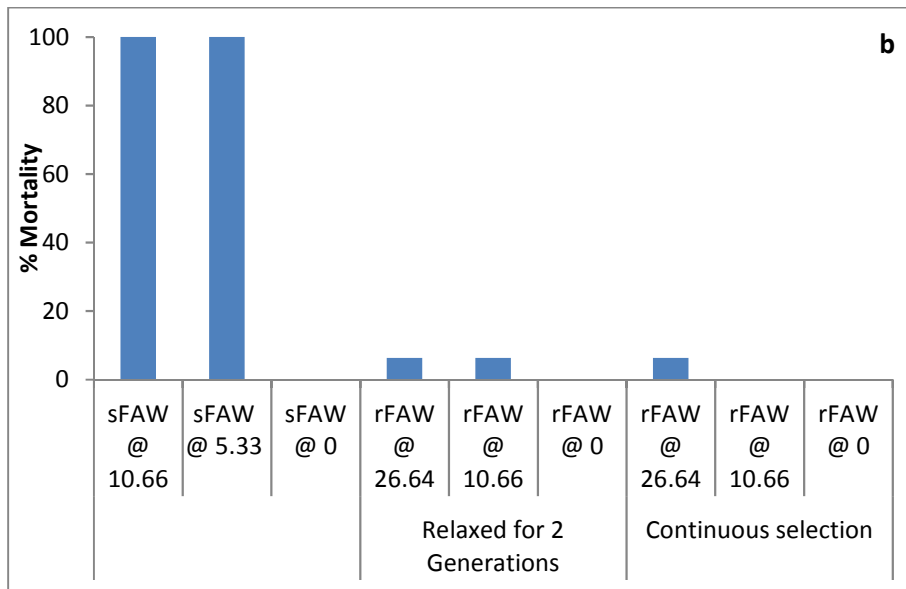

75

76 Supp. Figure S5: Response (a) and mortality (b) of Cry1Fa toxin core resistant and susceptible *S.*  
77 *frugiperda* populations in the Cry1Fa toxin core phenotyping assay.

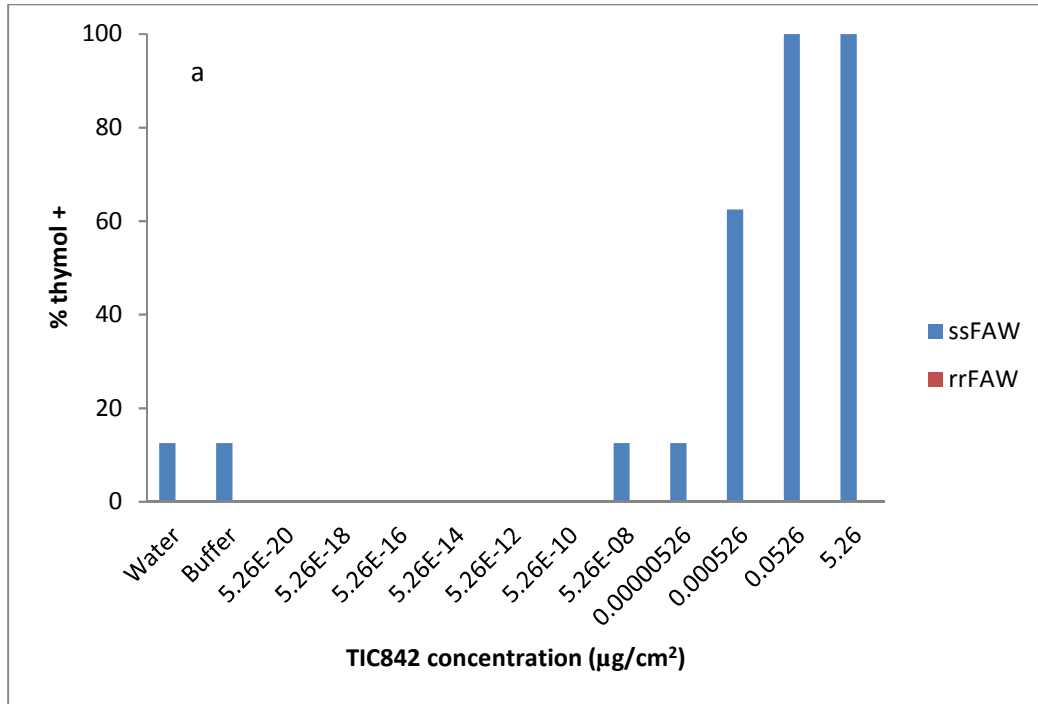

78

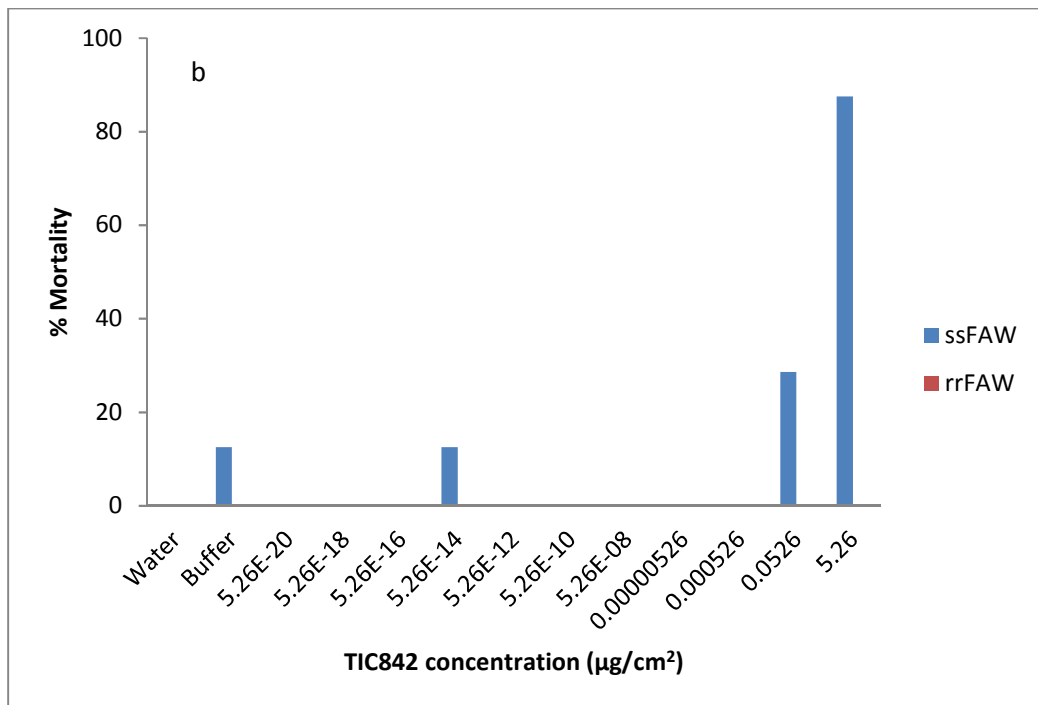

79

80

81

82 Supp. Table S1: Level of resistance and cross resistance to Cry1Fa toxin core and Cry1A.105 in  
 83 the resistant and susceptible *S. frugiperda* populations, respectively.

| Protein              | Strain      | LC <sub>50</sub> (fiducial limits) | Slope ± SE  | Resistance ratio |
|----------------------|-------------|------------------------------------|-------------|------------------|
| Cry1Fa<br>toxin core | Resistant   | >21,310*                           |             | >579-fold        |
|                      | Susceptible | 36.80 (28.53 - 49.53)              | 2.22 ± 0.28 | 1                |
| Cry1A.105            | Resistant   | >21,310                            |             | >87-fold         |
|                      | Susceptible | 243.79 (205.64 - 301.61)           | 2.58 ± 0.27 | 1                |

84 \* 9.38 and 25% mortality at 21,310ng/cm<sup>2</sup> for Cry1Fa toxin core and Cry1A.105, respectively

85

86



87 Supp. Table S2: Response of Cry1Fa/Cry1A.105 toxin resistant, susceptible and progenies of  
 88 reciprocal crosses of these two populations to Cry1Fa toxin core.

| Strain          | LC <sub>50</sub> (fiducial limits) | Slope       | Chi Sq  | Resistance ratio |
|-----------------|------------------------------------|-------------|---------|------------------|
| Resistant       | >21,310*                           |             |         | >740             |
| rMale X sFemale | 125.73 (82.05 - 193.93)            | 0.67 ± 0.35 | <0.0001 | 4.4              |
| sMale X rFemale | 98.03 (57.01 - 158.23)             | 0.67 ± 0.36 | <0.0001 | 3.41             |
| Susceptible     | 28.77 (9.06 - 52.74)               | 1.12 ± 0.26 | <0.0001 | 1                |

89 \* 0% mortality at 21,310 ng/cm<sup>2</sup>

90 Supp. Table S3: Primer sequences used in this study

| Assay                       | Forward Primer Seq.              | Reverse Primer Seq.        | VIC Probe Sequence | FAM Probe Sequence | <u>Resistant</u> | <u>Susceptible</u> |
|-----------------------------|----------------------------------|----------------------------|--------------------|--------------------|------------------|--------------------|
| <i>SfABCC2</i> cDNA         | ATGATGGACAAATCTAATAAAAATACCGCGTC | CTAAGCGGTTTTGGAATCACTTTCAT | NA                 | NA                 | NA               | NA                 |
| R <sub>1</sub> /WT Genotype | TGGAGGCCGAAGAGAGACA              | AGGAGTTGACTGACTTCATGTACCT  | CAAGCACATCGCCCACT  | CCAAGCACATCCCACT   | +GC              | -                  |
| R <sub>2</sub> /WT Genotype | AGGGTAACGTTCATTGTGATAATACC       | CGCTGACTGGAACATGATTAGTG    | CCATCCAACAGTACTTC  | CATCCAACAATACTTC   | GG               | AA                 |

91

92
